# Supplementary material for: Functional Analysis of the Glucuronyltransferases GlcAT-P and GlcAT-S of Drosophila melanogaster: Distinct Activities towards the O-linked T-antigen
Source: MDPI journal article supplement (doi:10.3390/biom6010008), 2016-01-06

# Supplementary Materials: Functional Analysis of the Glucuronyltransferases GlcAT-P and GlcAT-S of *Drosophila melanogaster*: Distinct Activities towards the O-linked T-antigen

Isabelle Breloy <sup>1,†,\*</sup>, Tilo Schwientek <sup>2,†</sup>, Deborah Althoff <sup>1</sup>, Marvin Holz <sup>1</sup>, Tim Koppen <sup>1</sup>, Angelika Krupa <sup>1</sup> and Franz-Georg Hanisch <sup>1</sup>

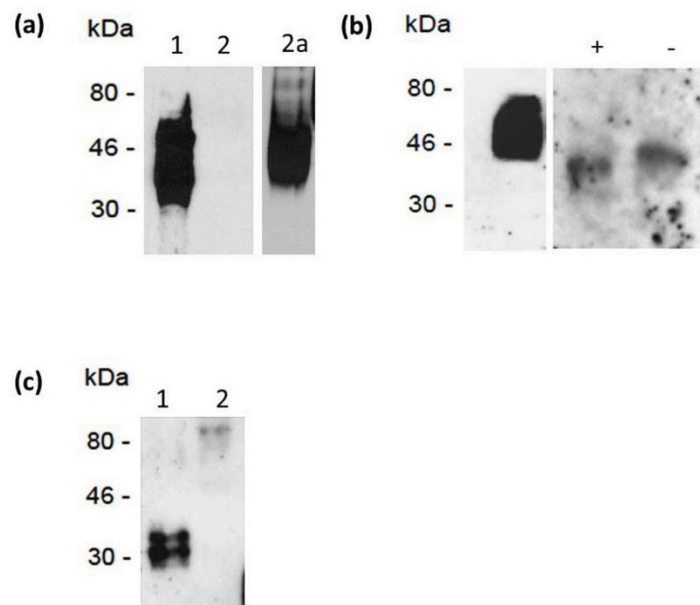

**Figure S1.** The specificities of the antibodies M6749 and 114-2G11-A were tested using a set of glycoproteins (5 µg/lane) glucuronylated *in vitro* by dGlcAT-Psol. (a) Western Blot showing that mAb M6749 is specific for N-linked glucuronic acid. Lane 1, glucuronylated asialofetuin, an N- and O-glycosylated protein. Lane 2, glucuronylated MUC1VH, an O-glycoprotein which is not detected by this antibody. Lane 3, MUC1VH detected by mAb anti-V5; (b) Immunoblots demonstrating mAb 114-2G11-A specificity for terminal beta-3-linked GlcA independently of the glycan type. O-Glycoprotein MUC1VH can be detected with this antibody (lane 1) as well as N- and O-glycosylated fetuin before (lane 3) and after (lane 2) PNGaseF digestion. The mass shift of the protein results from successful cleavage of the N-glycans chains; (c) MAb 114-2G11-A detects also N-glycosylated alpha1-acid glycoprotein after glucuronylation (lane 1). The signal disappears after digestion with beta-glucuronidase (lane2).

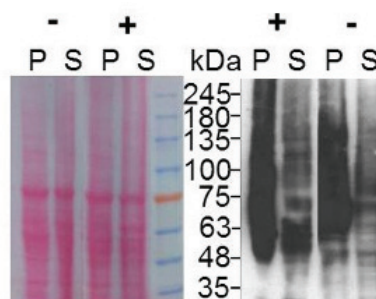

**Figure S2.** Western Blot with mAb 114-2G11-A (right panel) and loading/control with Ponceau Red (left panel) of cell lysates from dGlcAT-P (P) or dGlcAT-S (S) overexpressing cells before (-) and after (+) PNGase F digestion. Immunostaining reveals a strong increase of GlcA-epitopes in cells overexpressing GlcAT-P in the mass range around 70 kDa. A mass shift due to the cleavage of N-glycans can be observed, but no differences in the anti-GlcA staining patterns or signal intensities are obvious.

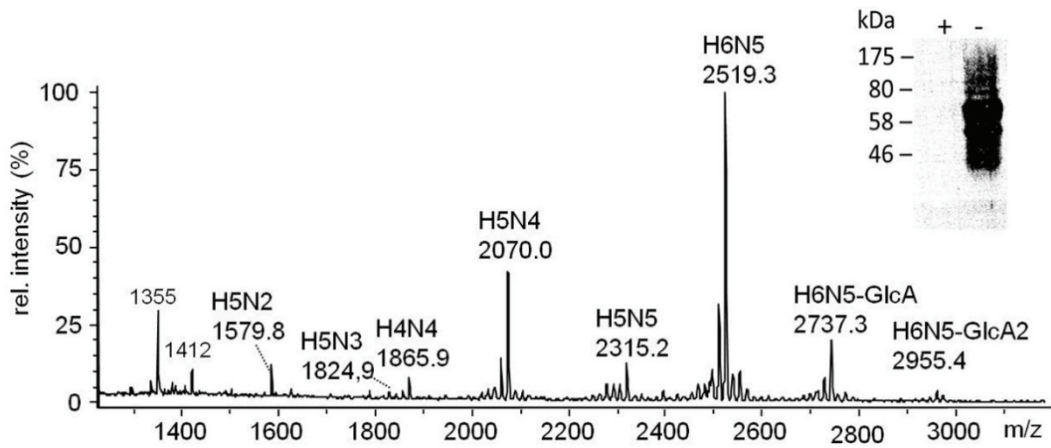

**Figure S3.** MALDI mass spectrometry of permethylated *N*-glycans after *in vitro* glucuronylation of asialofetuin by dGlcAT-S sol. The positive ion spectrum shows glucuronylated glycan chains at *m/z* 2737 and *m/z* 2955. Their presence was verified by western blot using anti-HNK1 antibody M6749 (insert) before (-) and after (+) PNGaseF digestion.

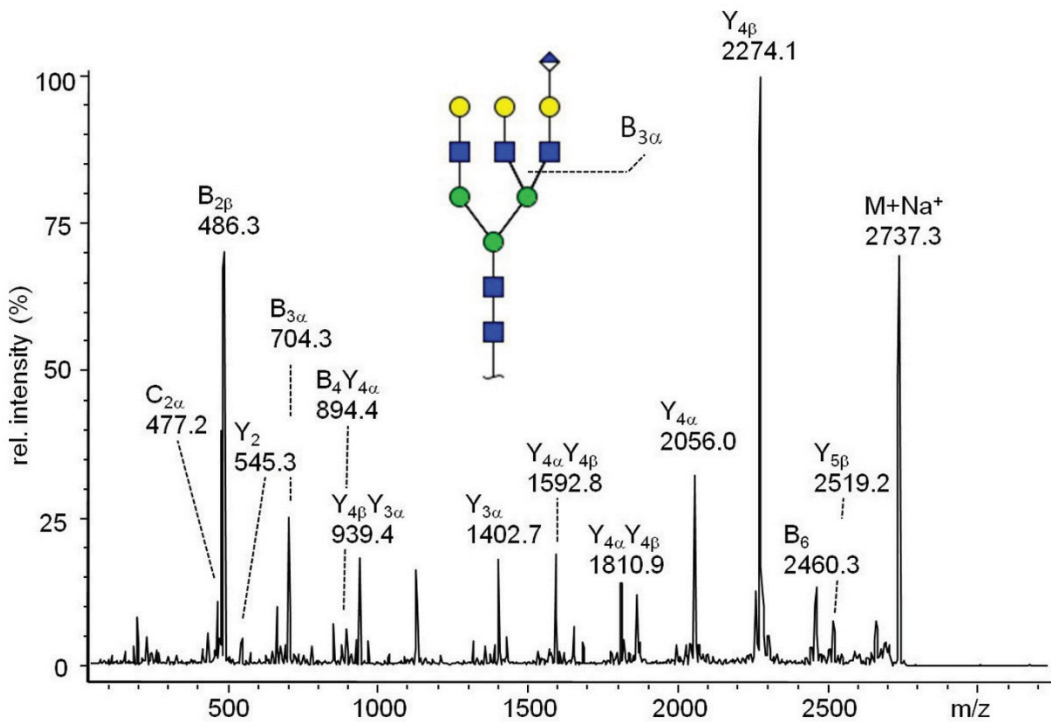

**Figure S4.** MALDI-MS/MS fragmentation analysis in the Post-Source-Decay mode of the permethylated non-sulfated HNK1-glycan at *m/z* 2737 ( $M + Na^+$ ), which was generated by *in vitro* glucuronylation of asialofetuin with dGlcAT-P sol.

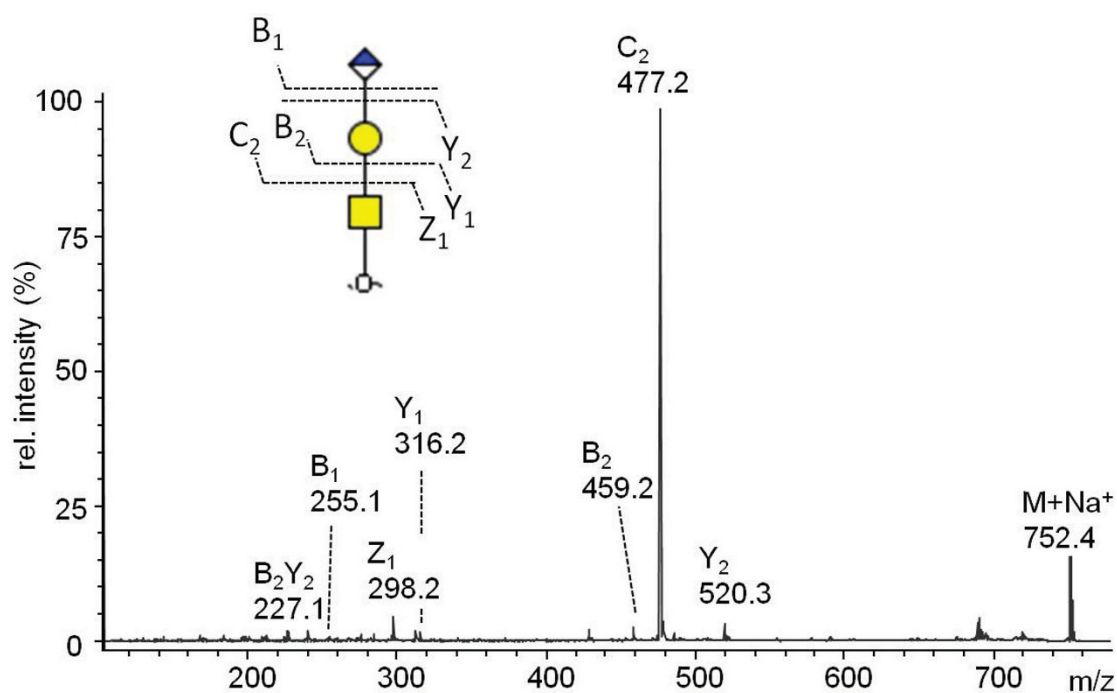

**Figure S5.** MALDI-MS/MS fragmentation analysis in the Post-Source-Decay mode of the permethylated glucuronyl T-glycan at  $m/z$  752 ( $M + Na^+$ ) derived from *in vitro* glucuronylated asialofetuin (dGlcAT-P sol). Fragmentation of the glycan is annotated according to the nomenclature of Domon and Costello.

$\alpha$ -giantin

$\alpha$ -V5

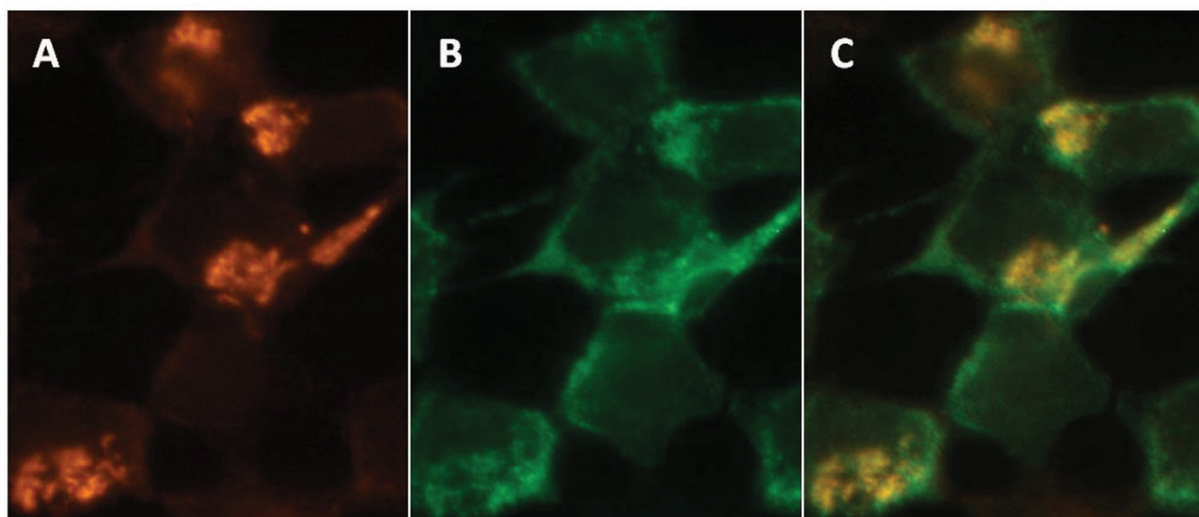

**Figure S6.** Co-localization of the *Drosophila* glucuronyltransferases in the Golgi of CHO-Lec2 cells. (A) stain of the Golgi membrane with giantin; (B) staining of the V5-tagged transferase dGlcAT-S with mAb anti-V5; (C) overlay of (A,B).

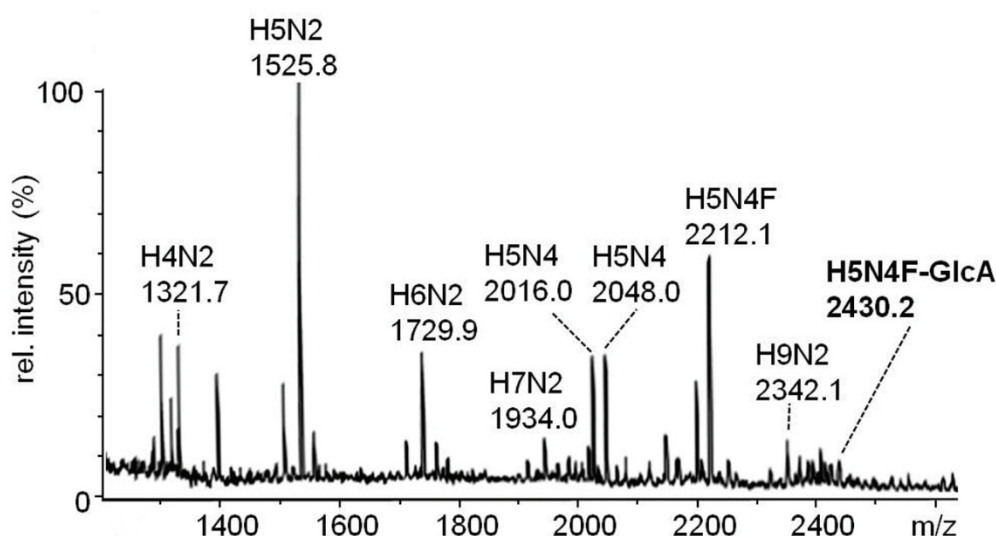

**Figure S7.** MALDI-MS spectrum of the permethylated N-glycan chains derived by PNGase F digestion from nidogen-1 G1–G2 coexpressed with dGlcAT-P in CHO-Lec2 cells. The monoisotopic masses were detected as  $M + Na^+ - 54$  or  $-32$  species, corresponding to a loss of sodium-methylate or methanol. A non-sulfated HNK1-epitope was detected at  $m/z$  2430 ( $M + Na^+ - 32$  Da).

**Table S1.** List of potentially glucuronylated proteins which were identified by mass spectrometry based proteomics of proteins from an S2 cell-lysate, coexpressed with dGlcAT-P and immunoprecipitated with mAb 114-2G11-A. The proteins were separated by SDS-PAGE and extracted from gel slices of the indicated mass range by in-gel-tryptic digestion. (ER: endoplasmic reticulum, EC: extracellular, N: nucleus, CP: cytoplasm, MI: mitochondrium, MT: microtubule, M: membrane).

| Protein                                                                                         | Mascot Score | Identified Peptides | Accession No. (NCBI) | Mass Range   |
|-------------------------------------------------------------------------------------------------|--------------|---------------------|----------------------|--------------|
| ERp60                                                                                           | 1077.09      | 24                  | gi 45551086          | IP 50–60 kDa |
| protein disulfide isomerase                                                                     | 940.49       | 23                  | gi 17647799          | IP 50–60 kDa |
| Aldehyde dehydrogenase                                                                          | 559.41       | 12                  | gi 20129399          | IP 50–60 kDa |
| Chain C, Crystal Structure Of A Filament-like Actin Trimer Bound To The Bacterial Effector VopI | 410.67       | 9                   | gi 551702010         | IP 50–60 kDa |
| Ugt86Da glycosyltransferase                                                                     | 358.95       | 10                  | gi 21357701          | IP 50–60 kDa |
| heat shock protein 83                                                                           | 344.12       | 9                   | gi 17647529          | IP 50–60 kDa |
| peptidase S28                                                                                   | 263.37       | 6                   | gi 20129649          | IP 50–60 kDa |
| Ugt58Fa                                                                                         | 215.98       | 4                   | gi 22024248          | IP 50–60 kDa |
| glycoprotein 93                                                                                 | 188.39       | 6                   | gi 21357739          | IP50–60 kDa  |
| vacuolar H <sup>+</sup> -ATPase                                                                 | 128.11       | 2                   | gi 17136796          | IP 50–60 kDa |
| oligosaccharide transferase delta subunit                                                       | 116.13       | 2                   | gi 19922486          | IP 50–60 kDa |
| Fimbrin                                                                                         | 113.63       | 2                   | gi 17647429          | IP 50–60 kDa |
| RE72002p                                                                                        | 104.72       | 3                   | gi 17944396          | IP 50–60 kDa |
| CG7920                                                                                          | 92.83        | 2                   | gi 21358615          | IP 50–60 kDa |
| Pyruvate kinase                                                                                 | 90.21        | 2                   | gi 3108349           | IP 50–60 kDa |
| heat shock protein cognate 72                                                                   | 728.97       | 17                  | gi 157658            | IP 60–70 kDa |
| oligosaccharide transferase delta subunit                                                       | 721.34       | 14                  | gi 19922486          | IP 60–70 kDa |
| heat shock protein 83                                                                           | 578.41       | 11                  | gi 17647529          | IP 60–70 kDa |
| heat shock protein cognate 4                                                                    | 578.07       | 4                   | gi 17737967          | IP 60–70 kDa |
| Chain C, Crystal Structure Of A Filament-like Actin Trimer Bound To The Bacterial Effector VopI | 454.09       | 11                  | gi 551702010         | IP 60–70 kDa |
| heat shock protein cognate 71                                                                   | 193.86       | 4                   | gi 157667            | IP 60–70 kDa |
| heat shock protein 60                                                                           | 181.86       | 4                   | gi 3757828           | IP 60–70 kDa |
| CG2918                                                                                          | 164.50       | 3                   | gi 20128923          | IP 60–70 kDa |
| hexosaminidase 2                                                                                | 138.87       | 2                   | gi 17933586          | IP 60–70 kDa |
| CD98 heavy chain                                                                                | 126.66       | 3                   | gi 17945866          | IP 60–70 kDa |
| vacuolar ATPase                                                                                 | 116.35       | 2                   | gi 17136986          | IP 60–70 kDa |
| Twinstar                                                                                        | 115.28       | 2                   | gi 17136986          | IP 60–70 kDa |
| glycoprotein 93                                                                                 | 107.26       | 2                   | gi 21357739          | IP 60–70 kDa |

|                                                                                                 |         |    |              |                |
|-------------------------------------------------------------------------------------------------|---------|----|--------------|----------------|
| Moesin                                                                                          | 107.24  | 2  | gi 24640670  | IP 60–70 kDa   |
| Inos                                                                                            | 96.05   | 2  | gi 17137626  | IP 60–70 kDa   |
| heat shock protein cognate 72                                                                   | 1828.28 | 39 | gi 157658    | IP 70–80 kDa   |
| heat shock protein cognate 4                                                                    | 858.27  | 14 | gi 17737967  | IP 70–80 kDa   |
| heat shock protein 83                                                                           | 328.07  | 7  | gi 17647529  | IP 70–80 kDa   |
| heat shock protein cognate 71                                                                   | 271.38  | 6  | gi 157667    | IP 70–80 kDa   |
| glycoprotein 93                                                                                 | 154.93  | 3  | gi 21357739  | IP 70–80 kDa   |
| heat shock protein 83                                                                           | 678.00  | 15 | gi 17647529  | IP 80–100 kDa  |
| Actin                                                                                           | 588.85  | 12 | gi 156750    | IP 80–100 kDa  |
| heat shock protein cognate 72                                                                   | 333.63  | 8  | gi 157658    | IP 80–100 kDa  |
| heat shock protein cognate 4                                                                    | 145.05  | 1  | gi 17737967  | IP 80–100 kDa  |
| glycoprotein 93                                                                                 | 126.20  | 4  | gi 21357739  | IP 80–100 kDa  |
| BerH2-scFv-hpRNase                                                                              | 90.90   | 4  | gi 164508020 | IP 80–100 kDa  |
| Chain C, Crystal Structure Of A Filament-like Actin Trimer Bound To The Bacterial Effector Vopl | 625.09  | 14 | gi 551702010 | IP 100–150 kDa |
| Actin 87E                                                                                       | 559.63  | 1  | gi 17137090  | IP 100–150 kDa |
| heat shock protein 83                                                                           | 275.46  | 4  | gi 17647529  | IP 100–150 kDa |
| Na <sup>+</sup> , K <sup>+</sup> -ATPase                                                        | 222.01  | 3  | gi 17861704  | IP 100–150 kDa |
| Scavenger receptor class C                                                                      | 112.17  | 2  | gi 984515    | IP 100–150 kDa |
| BerH2-scFv-hpRNase                                                                              | 96.81   | 4  | gi 164508020 | IP 100–150 kDa |
| heat shock protein cognate 72                                                                   | 1408.20 | 28 | gi 157658    | 60–70 kDa      |
| heat shock protein cognate 4                                                                    | 1050.97 | 15 | gi 17737967  | 60–70 kDa      |
| protein disulfide isomerase                                                                     | 922.30  | 22 | gi 17647799  | 60–70 kDa      |
| heat shock protein 83                                                                           | 904.56  | 20 | gi 17647529  | 60–70 kDa      |
| ERp60                                                                                           | 542.46  | 12 | gi 45551086  | 60–70 kDa      |
| Chain C, Crystal Structure Of A Filament-like Actin Trimer Bound To The Bacterial Effector Vopl | 394.68  | 11 | gi 551702010 | 60–70 kDa      |
| heat shock protein 60                                                                           | 357.71  | 8  | gi 33636453  | 60–70 kDa      |
| glycoprotein 93                                                                                 | 324.11  | 4  | gi 21357739  | 60–70 kDa      |
| heat shock protein cognate 1                                                                    | 305.17  | 1  | gi 17647515  | 60–70 kDa      |
| Inos                                                                                            | 264.43  | 6  | gi 17137626  | 60–70 kDa      |
| heat shock protein cognate 71                                                                   | 240.47  | 4  | gi 157667    | 60–70 kDa      |
| CG2918                                                                                          | 199.21  | 4  | gi 20128923  | 60–70 kDa      |
| vacuolar ATPase                                                                                 | 195.54  | 4  | gi 17136986  | 60–70 kDa      |
| thioredoxin peroxidase 1                                                                        | 170.66  | 3  | gi 17157991  | 60–70 kDa      |
| elongation factor 1alpha48D                                                                     | 153.74  | 4  | gi 17137572  | 60–70 kDa      |
| calcium-binding protein 1                                                                       | 131.37  | 2  | gi 19921434  | 60–70 kDa      |
| eukaryotic initiation factor 4a                                                                 | 123.69  | 3  | gi 17136248  | 60–70 kDa      |
| aldehyde dehydrogenase                                                                          | 112.62  | 3  | gi 20129399  | 60–70 kDa      |
| calnexin                                                                                        | 110.33  | 2  | gi 2213427   | 60–70 kDa      |
| beta-1 tubulin                                                                                  | 99.21   | 2  | gi 158739    | 60–70 kDa      |

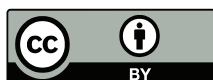

Supplement: s1 [file s1]
